# Supplementary material for: The ATG8 Family Proteins GABARAP and GABARAPL1 Target Antigen to Dendritic Cells to Prime CD4+ and CD8+ T Cells
Source: MDPI journal article supplement (doi:10.3390/cells11182782), 2022-09-06
Supplement: s1 [file s1]

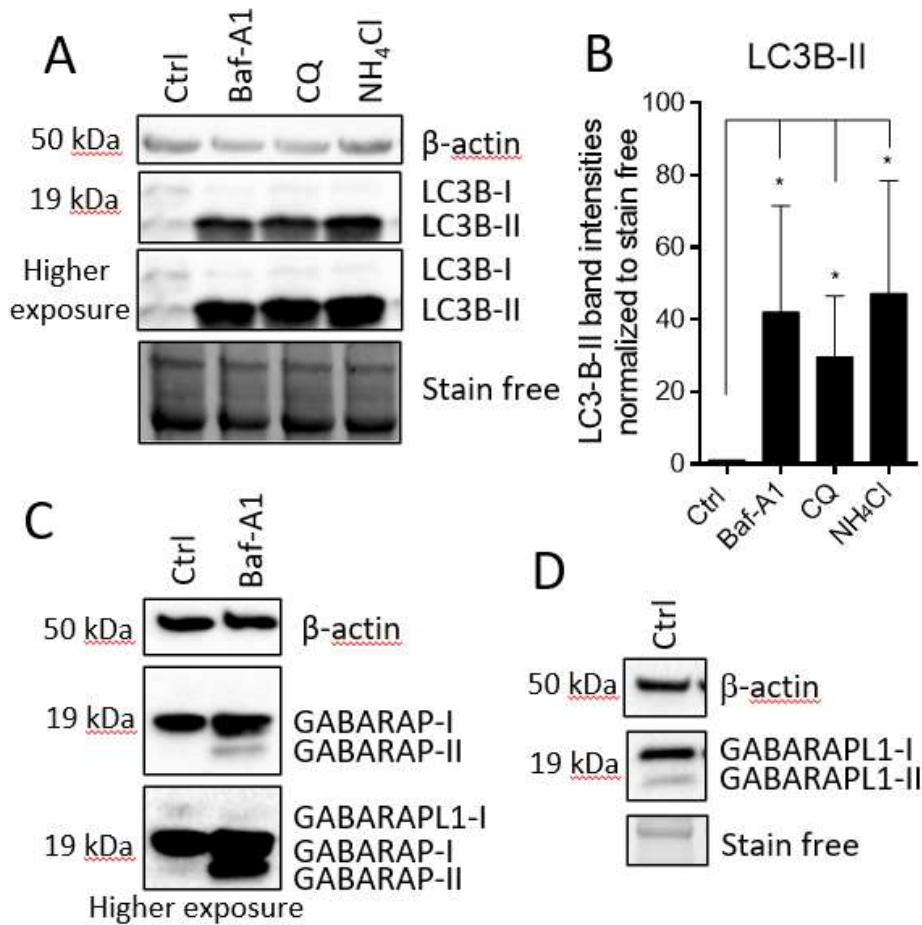

**Figure S1 : dendritic cells have basal autophagic flux. BmDC expressed GABARAP and GABARAPL1 proteins.** BmDC were treated during 2 h with different autophagic inhibitors: chloroquine (CQ, 40  $\mu$ M); bafilomycin-A1 (Baf-A1, 100 nM) and ammonium chloride (NH<sub>4</sub>Cl, 50 mM) at day 6 of differentiation. A) Cells lysates were analyzed by western blotting using anti-LC3B and anti-ACTIN antibodies on 12 % TGX gel. B) Autophagic flux was quantified by western blotting analysis of LC3B-II protein band intensities. LC3B-II band intensities were normalized to stain free band using Biorad stain free technologies. Statistic test: unpaired t-test, \*: P<0,05. The histogram was representative of 4 independent experiments. Error bars represent  $\pm$  SD. C) The expression of GABARAP and GABARAPL1 proteins were analyzed by western blotting on 12 % TGX gel using an anti-GABARAP-

GABARAPL1 antibodies. D) The expression of GABARAPL1 proteins was also analyzed using an anti-GABARAPL1 antibodies by western blotting.

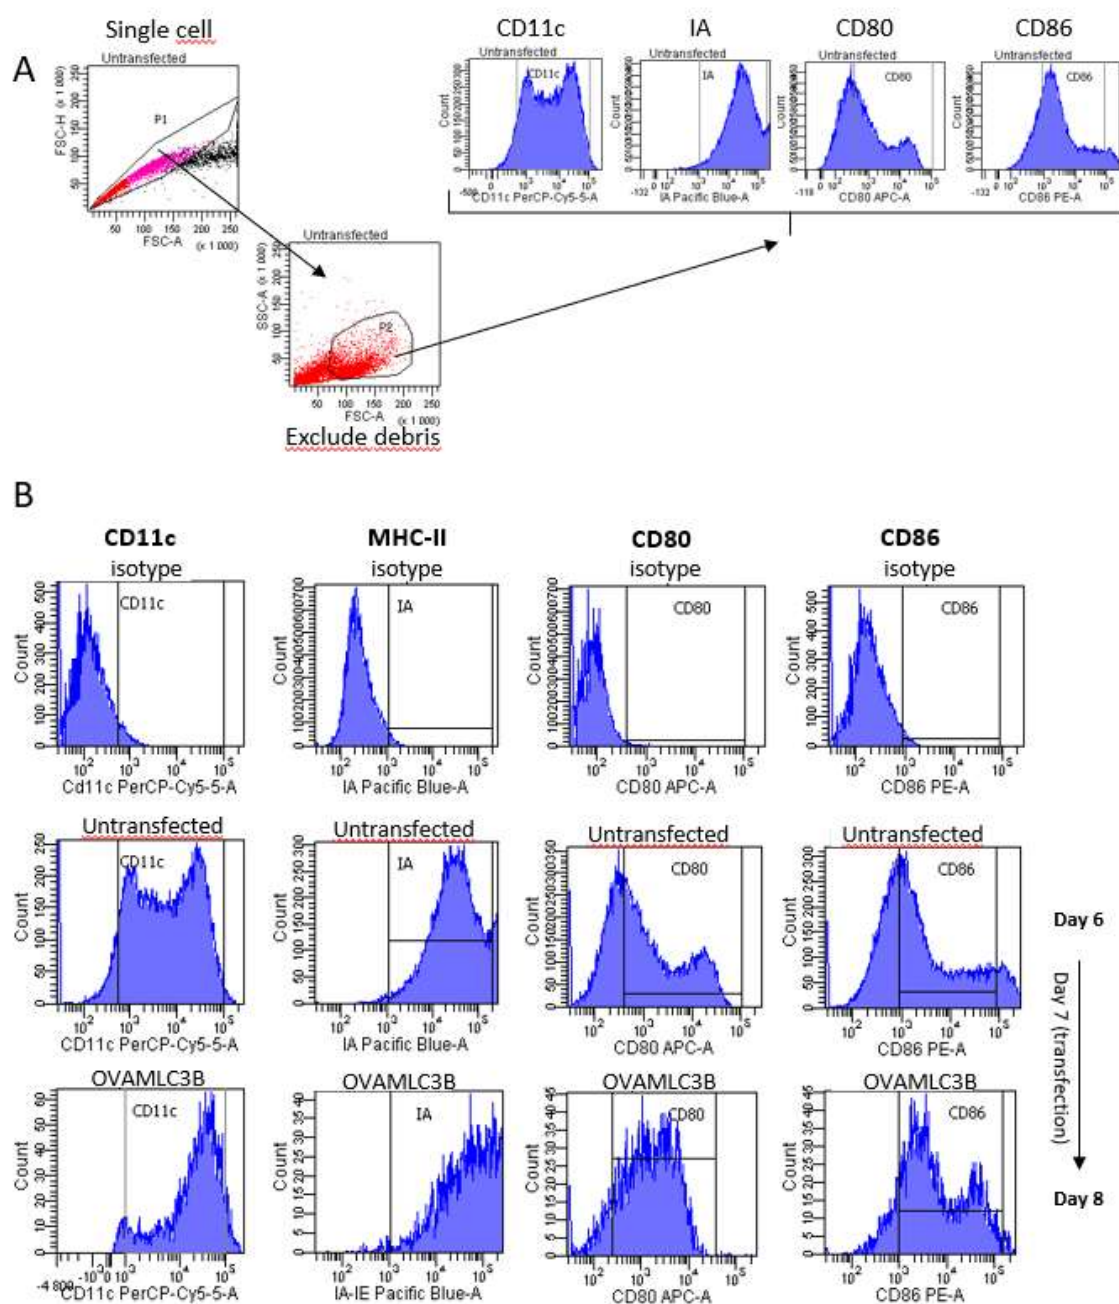

**Figure S2: Expression of CD11c, CMH-II, CD80, and CD86 on bmDCs were detected by flow cytometry prior (D6) and after (D8) transfection.** A) Flow cytometry strategy gating for the expression of CD11c, IA, and costimulatory molecules CD80 and CD86 after 6 days of bone marrow cells differentiation after 6 days. B) BmDC dendritic cells were transfected by the JETPEI-Macrophage kit plasmid vector encoding the OMLC3B protein at D7.
